# Supplementary material
Source: publisher site journal article supplement (http://www.spandidos-publications.com/3949/downloadSupplementary)
Supplement: Supplementary file 1 [file downloadSupplementary]

## Sheet: Sheet1
Table SII. Summary of RNA-sequencing data.
Sample	Raw reads	Raw bases (bp)	Clean reads	Clean bases (bp)	Clean rate (%)	Q20 rate (%)	Q30 rate (%)	GC rate (%)
FT1	34743079	10422923700	27945187	7896506881	80.43	98.95	96.55	50
FT2	38333268	11499980400	31386150	8873186600	81.88	99	96.68	50
FTC1	36113842	10834152600	29084536	8205386536	80.54	98.94	96.51	50
FTC2	35940159	10782047700	29046651	8198894865	80.82	98.96	96.58	50
FTC3	24927163	7478148900	22453322	6531909170	90.08	99.2	96.97	46
FTC4	27844855	8353456500	25267489	7353781580	90.74	99.23	97.1	45
OV1	36956306	11086891800	29668005	8363475479	80.28	98.94	96.53	49
OV2	38118493	11435547900	30977621	8751296872	81.27	98.97	96.62	49
OVC1	41450905	12435271500	33233732	9367510461	80.18	98.94	96.5	50
OVC2	21625377	6487613100	19356953	5631453127	89.51	99.18	96.9	47
OVC3	26897026	8069107800	24115784	7016719045	89.66	99.2	96.94	48
OVC4	34723131	10416939300	28603024	8089449684	82.37	99.03	96.81	50
Average	33139467	9941840100	2.75949e+07	7.85663e+09	83.98	99.045	96.7242	48.6667
FT, healthy fallopian tubes; FTC, fallopian tube cancer; OV, healthy ovarian tissue; OVC, ovarian cancer.
